# Supplementary material
Source: publisher site journal article supplement (https://www.spandidos-publications.com/3870/downloadSupplementary)

Figure S1. ROS production in neutrophils. Flow cytometry plots demonstrated significantly higher production of ROS in neutrophils from the SP group compared with those from the HP group. The increased production of ROS was reversed by treatment with DPI in neutrophils. ROS, reactive oxygen species; HP, healthy volunteers; SP, sepsis; DPI, diphenyleneiodonium.

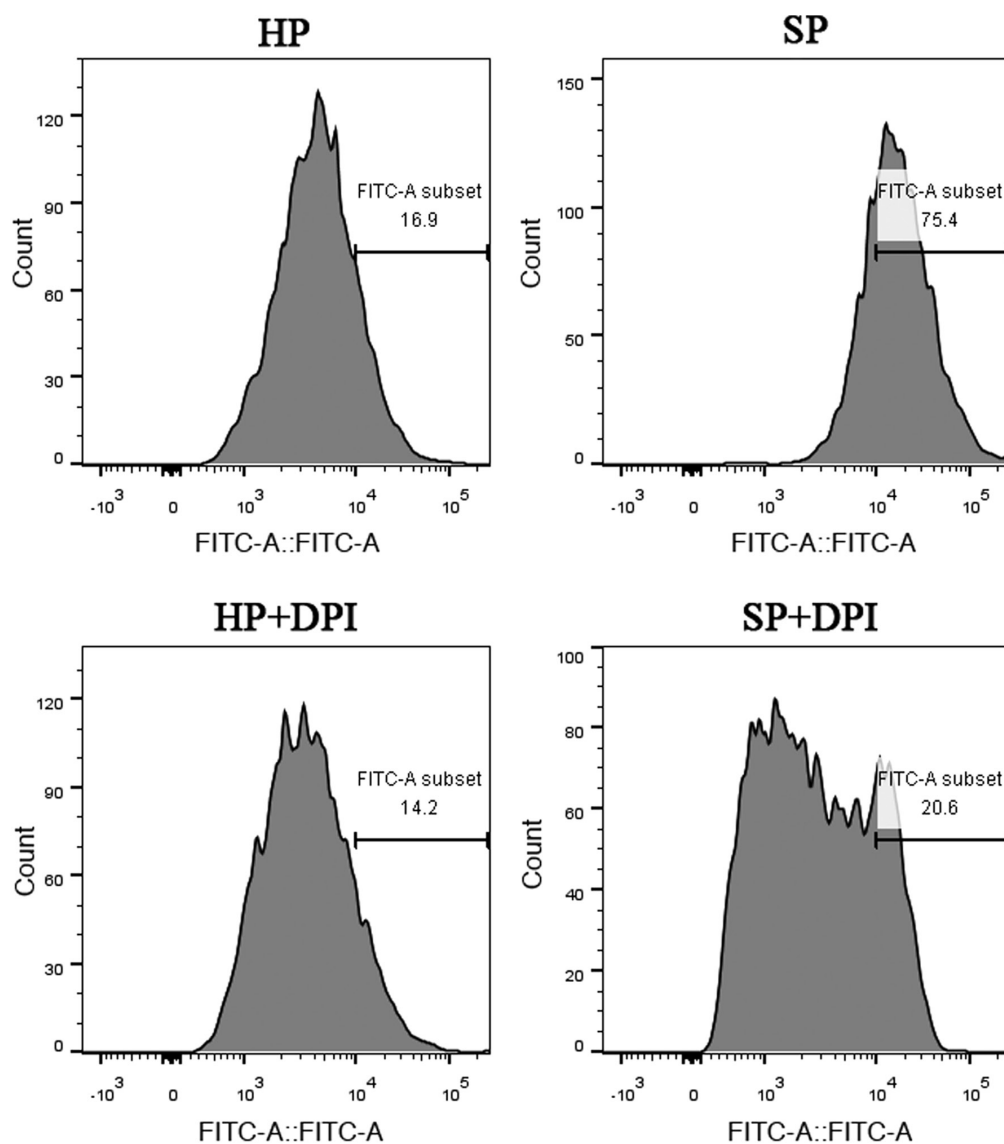

Supplement: Supplementary file 1 [file downloadSupplementary]
